# Supplementary material for: Diagnostic accuracy of high b-value diffusion weighted imaging for patients with prostate cancer: a diagnostic comprehensive analysis
Source: publisher site journal article supplement (doi:10.18632/aging.203164), 2021-06-22
Supplement: Supplementary file [file aging-v13i12-203164-supplementary-material-SD2.pdf]

**SUPPLEMENTARY MATERIALS**

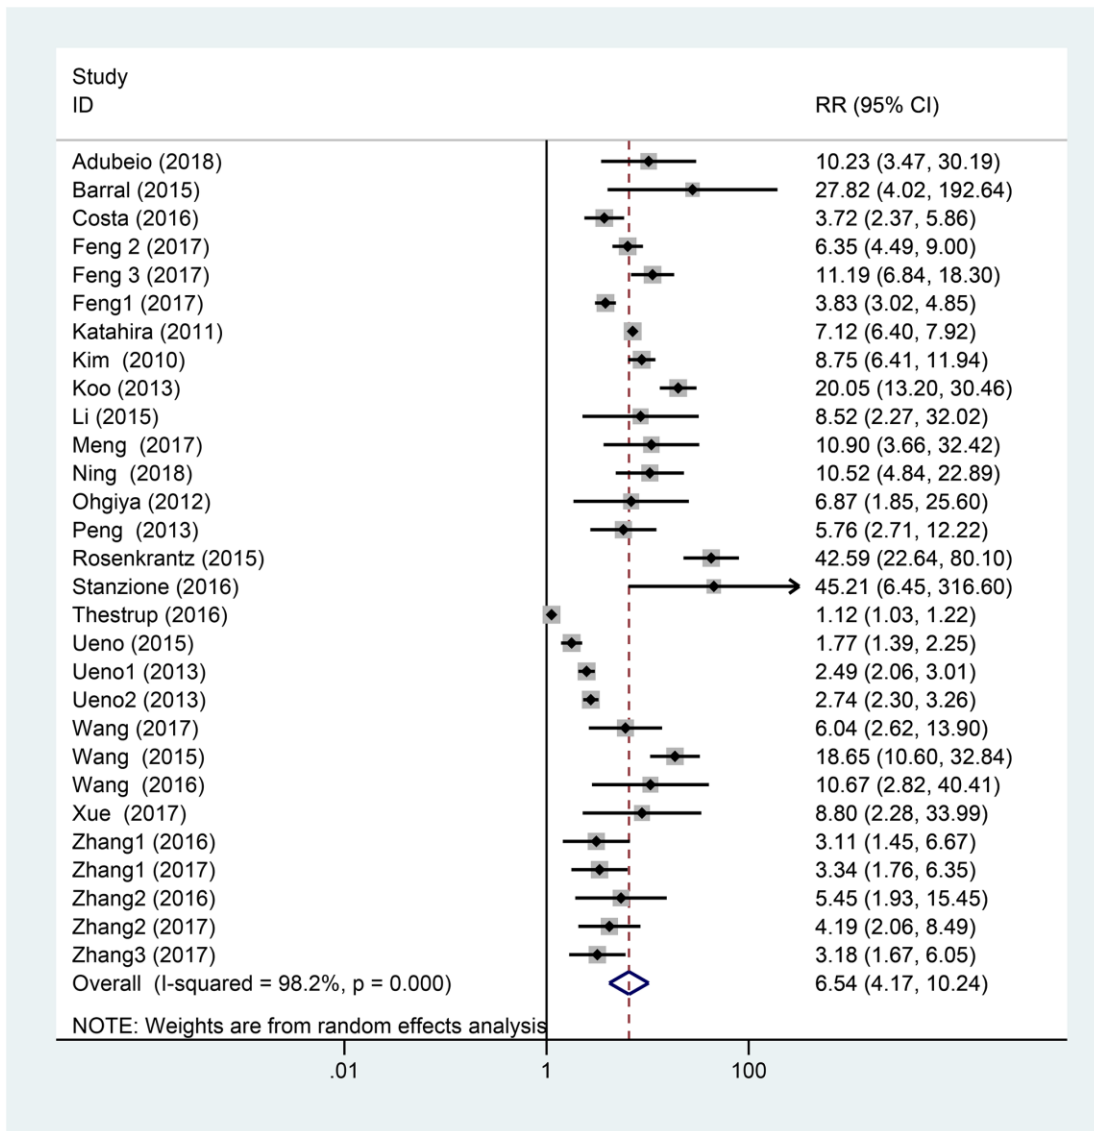

**Supplementary Material 2. Forest plot of pooled positive likelihood ratio of diagnostic accuracy of high *b*-value DWI for detecting prostate cancer.**

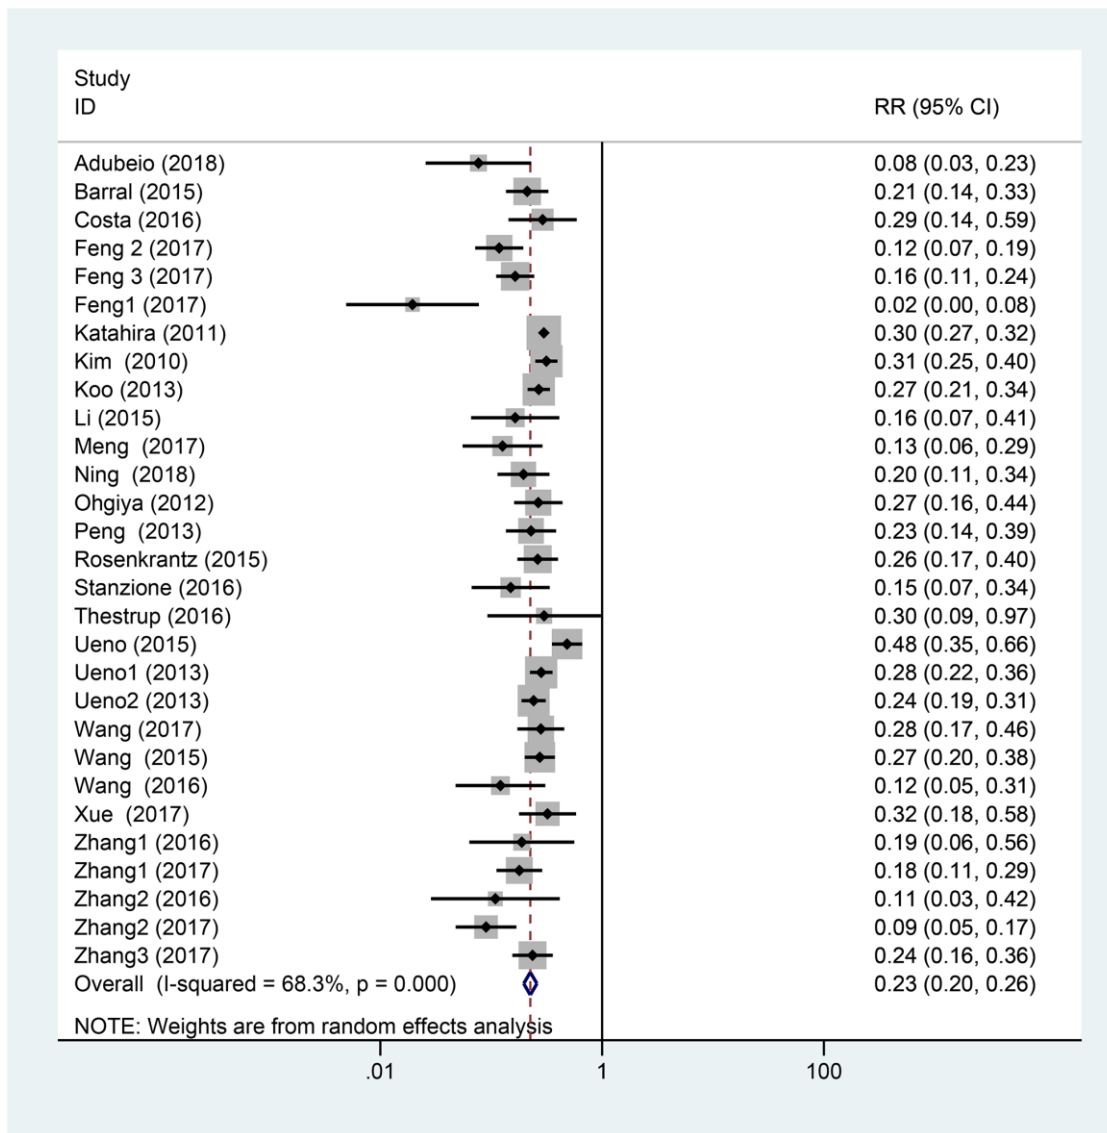

Supplementary Material 3. Forest plot of pooled negative likelihood ratio of diagnostic accuracy of high b-value DWI for detecting prostate cancer.

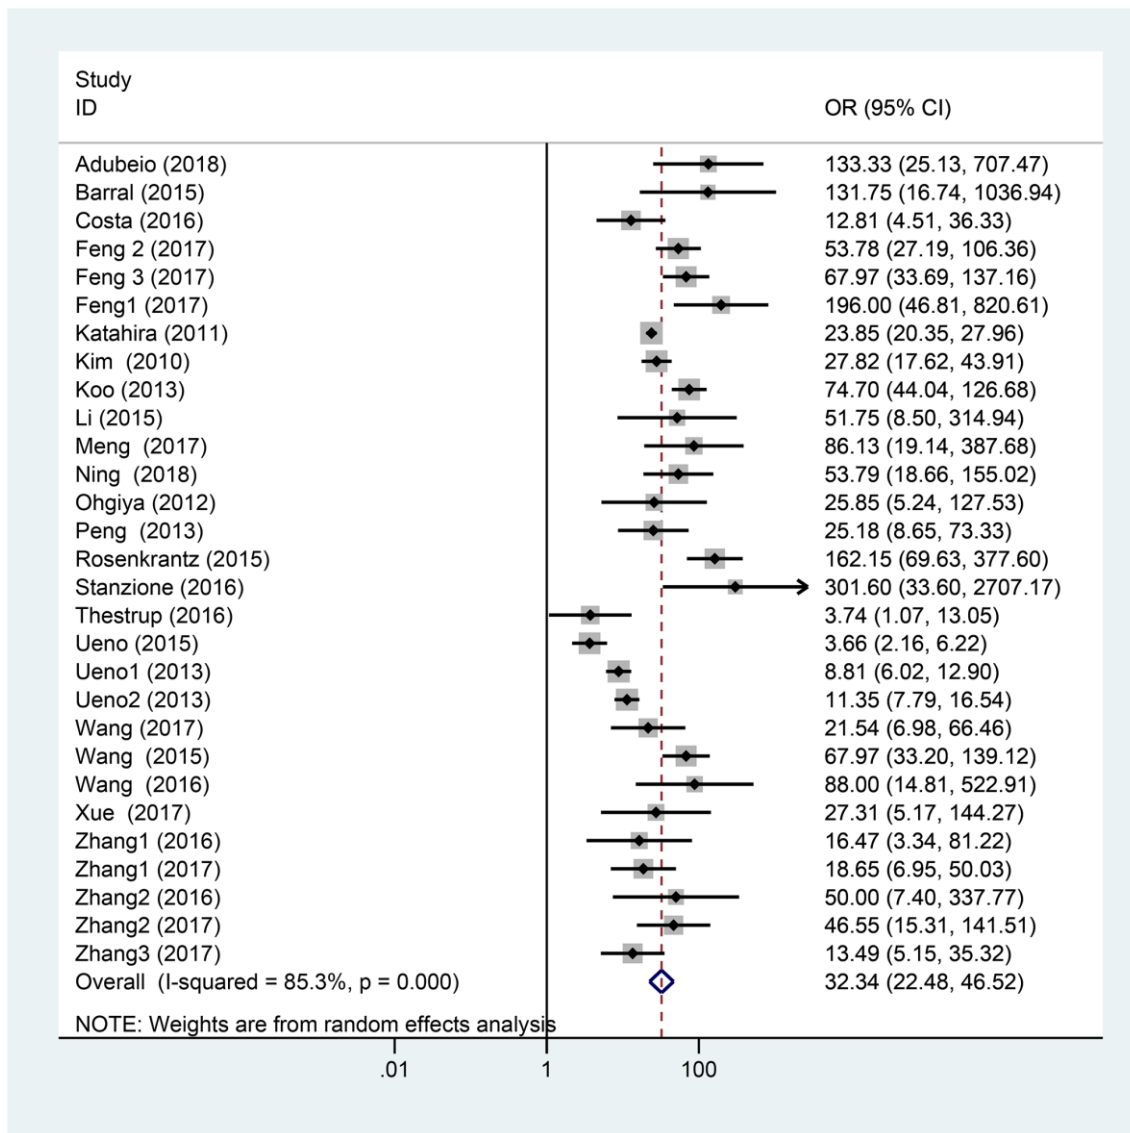

Supplementary Material 4. Forest plot of pooled diagnostic odds ratio of diagnostic accuracy of high *b*-value DWI for detecting prostate cancer.
